# Supplementary material
Source: PubMed Central journal article supplement (PMC3590475)
Supplement: supp_jc.2012-4022_JC-12-4022_SupTables1-6.pdf [file supp_jc.2012-4022_JC-12-4022_SupTables1-6.pdf]

Supplemental Table 1. Frequency of calcium testing and incidence of primary hyperparathyroidism per 100,000 person-years (crude, age-adjusted) by year, 1995-2010

|                 |           | Percent enrollees with at least one calcium test |            |            |            |            |            |            |            |              |            |
|-----------------|-----------|--------------------------------------------------|------------|------------|------------|------------|------------|------------|------------|--------------|------------|
|                 | Race      | N                                                | 1995       | 1996       | 1997       | 1998       | 1999       | 2000       | 2001       | 2002         | 2003       |
| Women           | Asian     | 122,865                                          | 6.2        | 6.7        | 6.8        | 7.5        | 7.6        | 7.5        | 8.2        | 8.5          | 9.1        |
|                 | Black     | 233,195                                          | 9.1        | 10.2       | 10.7       | 11.1       | 11.6       | 11.2       | 11.6       | 12.0         | 12.6       |
|                 | Hispanic  | 333,001                                          | 6.0        | 6.8        | 6.5        | 6.6        | 6.6        | 6.5        | 6.9        | 7.1          | 7.4        |
|                 | Other     | 206,860                                          | 3.1        | 3.3        | 3.2        | 3.0        | 3.1        | 3.0        | 3.7        | 4.1          | 4.2        |
|                 | White     | 781,793                                          | 9.2        | 9.9        | 9.8        | 10.1       | 10.4       | 10.2       | 12.0       | 13.1         | 13.4       |
|                 | All races |                                                  | 6.8        | 7.3        | 7.2        | 7.2        | 7.4        | 7.2        | 8.2        | 8.7          | 9.0        |
| Men             | Asian     | 71,595                                           | 6.0        | 7.4        | 7.6        | 7.9        | 7.8        | 8.0        | 8.2        | 7.7          | 9.0        |
|                 | Black     | 131,363                                          | 8.6        | 9.5        | 10.0       | 10.6       | 11.0       | 11.0       | 10.9       | 11.0         | 11.5       |
|                 | Hispanic  | 226,493                                          | 5.5        | 6.2        | 7.1        | 5.8        | 5.8        | 5.6        | 5.6        | 5.4          | 5.6        |
|                 | Other     | 153,749                                          | 2.1        | 2.0        | 1.9        | 1.7        | 1.8        | 1.8        | 1.9        | 2.0          | 2.1        |
|                 | White     | 513,228                                          | 8.0        | 8.6        | 8.9        | 9.1        | 9.4        | 9.1        | 9.1        | 9.6          | 10.0       |
|                 | All races |                                                  | 5.3        | 5.7        | 5.7        | 5.4        | 5.6        | 5.5        | 5.5        | 5.7          | 6.0        |
| Incidence rates |           |                                                  |            |            |            |            |            |            |            |              |            |
| Women           | Classic   | 4,988                                            | 32.0, 36.0 | 37.8, 37.7 | 32.0, 31.9 | 29.7, 32.1 | 22.0, 21.2 | 19.5, 20.1 | 25.8, 27.5 | 43.6, 46.3   | 37.8, 29.7 |
|                 | Non-clas. | 5,148                                            | 23.1, 23.9 | 24.0, 28.5 | 27.1, 33.1 | 24.7, 27.0 | 10.6, 12.6 | 14.8, 14.9 | 35.8, 34.0 | 64.0, 72.2   | 46.4, 48.0 |
|                 | Possible  | 284                                              | 5.2, 7.7   | 4.2, 5.4   | 2.4, 3.2   | 2.6, 3.3   | 2.0, 2.5   | 1.5, 1.6   | 1.5, 1.5   | 1.6, 1.7     | 0.9, 1.0   |
|                 | Total     | 10,420                                           | 60.3, 67.6 | 66.0, 71.6 | 61.5, 68.2 | 57.0, 62.4 | 34.6, 36.3 | 35.8, 36.6 | 63.1, 63.0 | 109.2, 120.2 | 85.1, 78.7 |
| Men             | Classic   | 1,759                                            | 18.1, 14.9 | 21.0, 20.9 | 14.9, 14.5 | 11.1, 11.8 | 11.1, 11.1 | 10.2, 10.8 | 12.8, 12.0 | 13.3, 14.2   | 10.3, 10.2 |
|                 | Non-clas. | 1,470                                            | 9.8, 9.6   | 15.1, 15.7 | 11.3, 11.8 | 9.3, 9.6   | 8.5, 7.1   | 8.6, 8.9   | 6.7, 6.7   | 15.6, 15.8   | 11.2, 11.6 |
|                 | Possible  | 165                                              | 3.0, 3.4   | 2.9, 3.3   | 3.0, 2.9   | 2.3, 2.2   | 1.1, 1.0   | 0.8, 0.7   | 0.5, 0.5   | 0.8, 0.8     | 0.6, 0.7   |
|                 | Total     | 3,394                                            | 30.9, 27.9 | 39.0, 35.6 | 29.2, 29.2 | 22.7, 23.6 | 20.7, 19.2 | 19.6, 20.4 | 20.0, 19.2 | 29.7, 30.8   | 27.5, 22.5 |

Supplemental Table 1 (cont'd). Frequency of calcium testing and incidence of primary hyperparathyroidism per 100,000 person-years (crude, age-adjusted) by year, 1995-2010

|                 |           | Percent enrollees with at least one calcium lab value |            |            |            |            |            |            |                  |  |
|-----------------|-----------|-------------------------------------------------------|------------|------------|------------|------------|------------|------------|------------------|--|
| Sex             | Race      | 2004                                                  | 2005       | 2006       | 2007       | 2008       | 2009       | 2010       | Mean (All years) |  |
| Women           | Asian     | 9.6                                                   | 10.0       | 10.8       | 10.7       | 11.1       | 12.3       | 12.8       | 9.1              |  |
|                 | Black     | 13.5                                                  | 14.2       | 15.0       | 14.4       | 15.3       | 17.1       | 18.3       | 13.0             |  |
|                 | Hispanic  | 8.0                                                   | 8.2        | 8.5        | 8.3        | 9.0        | 10.1       | 11.2       | 7.7              |  |
|                 | Other     | 4.6                                                   | 4.6        | 5.0        | 4.9        | 5.0        | 5.7        | 6.0        | 4.2              |  |
|                 | White     | 13.9                                                  | 14.3       | 15.0       | 14.8       | 15.5       | 17.0       | 17.7       | 12.9             |  |
|                 | All races | 9.6                                                   | 9.9        | 10.4       | 10.1       | 10.8       | 11.9       | 12.7       | 9.0              |  |
| Men             | Asian     | 9.0                                                   | 8.9        | 9.8        | 9.9        | 10.4       | 11.4       | 11.9       | 8.8              |  |
|                 | Black     | 12.2                                                  | 12.9       | 13.6       | 13.2       | 13.6       | 15.0       | 16.2       | 11.9             |  |
|                 | Hispanic  | 6.1                                                   | 6.4        | 6.7        | 6.5        | 6.8        | 7.7        | 8.7        | 6.4              |  |
|                 | Other     | 2.3                                                   | 2.4        | 2.6        | 2.6        | 2.6        | 3.0        | 3.2        | 2.3              |  |
|                 | White     | 10.4                                                  | 10.9       | 11.5       | 11.7       | 12.3       | 13.5       | 14.7       | 10.4             |  |
|                 | All races | 6.3                                                   | 6.6        | 7.0        | 7.0        | 7.3        | 8.2        | 8.9        | 6.4              |  |
| Incidence rates |           |                                                       |            |            |            |            |            |            |                  |  |
| Women           | Classic   | 38.6, 36.6                                            | 18.4, 17.6 | 17.8, 17.6 | 29.0, 26.4 | 42.5, 39.3 | 39.6, 40.5 | 57.3, 48.5 | 32.7, 31.8       |  |
|                 | Non-clas. | 35.3, 36.1                                            | 32.4, 31.4 | 18.1, 15.4 | 28.4, 24.4 | 33.2, 33.6 | 32.9, 34.1 | 36.1, 36.2 | 30.4, 31.6       |  |
|                 | Possible  | 0.9, 0.9                                              | 0.7, 0.8   | 1.0, 1.0   | 0.7, 0.7   | 1.1, 1.2   | 0.8, 0.8   | 0.8, 0.7   | 1.7, 2.1         |  |
|                 | Total     | 74.8, 73.6                                            | 51.5, 49.8 | 36.9, 34.0 | 58.1, 51.5 | 76.8, 74.1 | 73.3, 75.4 | 94.2, 85.4 | 64.9, 65.5       |  |
| Men             | Classic   | 11.8, 11.3                                            | 7.2, 7.2   | 9.1, 9.0   | 17.6, 15.5 | 17.8, 15.4 | 18.4, 16.6 | 17.2, 14.7 | 13.9, 13.1       |  |
|                 | Non-clas. | 6.5, 6.8                                              | 9.0, 9.1   | 4.3, 4.0   | 7.5, 7.8   | 12.0, 12.0 | 16.8, 15.4 | 15.9, 13.7 | 10.5, 10.3       |  |
|                 | Possible  | 0.6, 0.5                                              | 0.6, 0.6   | 0.5, 0.4   | 0.2, 0.2   | 0.6, 0.6   | 0.3, 0.2   | 0.2, 0.2   | 1.1, 1.2         |  |
|                 | Total     | 18.9, 18.6                                            | 16.8, 16.9 | 13.9, 13.4 | 25.3, 23.5 | 30.4, 28.0 | 35.5, 32.2 | 33.3, 28.6 | 25.5, 24.7       |  |

Supplemental Table 2. Average primary hyperparathyroidism crude incidence rates per 100,000 person-years by race and age group for women and men (all years)

All PHPT GROUPS

| Women                  |       | Race  |          |       |       |           |  |
|------------------------|-------|-------|----------|-------|-------|-----------|--|
| Age Group              | Asian | Black | Hispanic | Other | White | All races |  |
| 20-29                  | 25.6  | 23.7  | 6.4      | 4.5   | 11.6  | 12.1      |  |
| 30-39                  | 19.2  | 22.8  | 9.3      | 5.4   | 15.5  | 14.5      |  |
| 40-49                  | 26.0  | 40.9  | 17.9     | 7.2   | 30.1  | 24.4      |  |
| 50-59                  | 75.2  | 113.1 | 66.6     | 35.9  | 107.4 | 79.6      |  |
| 60-69                  | 130.2 | 197.6 | 96.7     | 56.9  | 179.0 | 130.9     |  |
| 70-79                  | 174.6 | 297.9 | 159.2    | 83.9  | 248.6 | 195.7     |  |
| ≥ 80                   | 352.9 | 392.1 | 232.5    | 142.6 | 239.3 | 257.0     |  |
| All ages, crude        | 114.8 | 155.4 | 84.1     | 48.0  | 118.8 | 102.0     |  |
| All ages, age adjusted | 51.8  | 92.0  | 48.6     | 25.4  | 81.0  | 59.8      |  |
| <b>Men</b>             |       |       |          |       |       |           |  |
| Age Group              |       |       |          |       |       |           |  |
| 20-29                  | 62.9  | 43.5  | 10.3     | 2.9   | 16.8  | 21.3      |  |
| 30-39                  | 50.3  | 39.5  | 9.9      | 4.1   | 20.3  | 21.6      |  |
| 40-49                  | 37.4  | 39.2  | 14.7     | 5.9   | 22.8  | 23.0      |  |
| 50-59                  | 45.7  | 53.9  | 23.6     | 9.0   | 39.3  | 35.6      |  |
| 60-69                  | 67.9  | 104.5 | 40.1     | 17.5  | 49.0  | 58.9      |  |
| 70-79                  | 122.1 | 160.5 | 70.5     | 34.5  | 78.9  | 94.6      |  |
| ≥ 80                   | 175.0 | 234.8 | 100.2    | 51.1  | 89.2  | 154.3     |  |
| All ages, crude        | 80.2  | 96.6  | 38.5     | 17.8  | 45.2  | 58.5      |  |
| All ages, age adjusted | 27.9  | 46.0  | 17.1     | 5.9   | 29.4  | 25.3      |  |

Classic PHPT

| Women     |       | Race  |          |       |       |           |  |
|-----------|-------|-------|----------|-------|-------|-----------|--|
| Age Group | Asian | Black | Hispanic | Other | White | All races |  |
| 20-29     | 9.4   | 10.0  | 2.1      | 1.2   | 3.8   | 4.7       |  |
| 30-39     | 6.2   | 9.1   | 4.4      | 2.0   | 7.1   | 6.2       |  |
| 40-49     | 10.8  | 22.2  | 10.0     | 2.3   | 15.9  | 13.1      |  |
| 50-59     | 29.0  | 62.4  | 36.9     | 11.0  | 44.1  | 36.7      |  |
| 60-69     | 53.0  | 123.8 | 52.9     | 21.7  | 76.6  | 65.6      |  |

|                        |       |       |      |      |       |       |
|------------------------|-------|-------|------|------|-------|-------|
| 70-79                  | 72.6  | 183.2 | 82.0 | 37.3 | 110.9 | 98.6  |
| ≥ 80                   | 109.4 | 199.8 | 99.9 | 58.1 | 112.5 | 119.5 |
| All ages, crude        | 42.1  | 97.4  | 41.0 | 24.2 | 57.8  | 54.0  |
| All ages, age adjusted | 21.3  | 56.7  | 26.6 | 11.0 | 36.3  | 31.6  |
| Men                    |       |       |      |      |       |       |
| Age Group              |       |       |      |      |       |       |
| 20-29                  | 17.6  | 14.0  | 2.8  | 1.1  | 4.8   | 6.6   |
| 30-39                  | 16.3  | 16.0  | 3.7  | 0.9  | 6.0   | 7.4   |
| 40-49                  | 13.4  | 14.0  | 6.6  | 1.5  | 8.3   | 8.8   |
| 50-59                  | 18.1  | 27.8  | 9.4  | 3.8  | 17.6  | 16.8  |
| 60-69                  | 27.4  | 62.1  | 22.8 | 7.0  | 24.3  | 30.3  |
| 70-79                  | 45.0  | 97.7  | 34.0 | 19.0 | 44.2  | 53.0  |
| ≥ 80                   | 87.6  | 145.6 | 73.2 | 51.1 | 45.1  | 84.1  |
| All ages, crude        | 28.2  | 59.1  | 19.4 | 7.6  | 21.9  | 28.7  |
| All ages, age adjusted | 13.1  | 27.3  | 9.7  | 2.7  | 13.6  | 14.2  |

#### Non-classic PHPT

| Women                  | Race  |       |          |       |       |           |
|------------------------|-------|-------|----------|-------|-------|-----------|
| Age Group              | Asian | Black | Hispanic | Other | White | All races |
| 20-29                  | 9.4   | 7.9   | 2.9      | 1.6   | 5.0   | 4.3       |
| 30-39                  | 6.4   | 8.8   | 3.1      | 1.9   | 6.5   | 5.4       |
| 40-49                  | 9.2   | 13.4  | 5.4      | 3.4   | 12.4  | 8.6       |
| 50-59                  | 39.3  | 44.8  | 23.7     | 22.6  | 61.0  | 38.3      |
| 60-69                  | 66.4  | 65.8  | 37.5     | 30.6  | 97.5  | 59.5      |
| 70-79                  | 102.0 | 96.4  | 64.8     | 34.2  | 133.0 | 86.4      |
| ≥ 80                   | 134.6 | 118.9 | 84.2     | 45.0  | 105.6 | 95.7      |
| All ages, crude        | 58.7  | 58.0  | 31.5     | 21.8  | 60.6  | 45.8      |
| All ages, age adjusted | 28.7  | 32.8  | 19.9     | 13.4  | 42.3  | 27.7      |

#### Men

| Age Group |      |      |      |      |      |      |
|-----------|------|------|------|------|------|------|
| 20-29     | 21.1 | 16.6 | 3.4  | 1.8  | 8.5  | 8.1  |
| 30-39     | 18.3 | 13.7 | 4.1  | 2.3  | 10.7 | 8.9  |
| 40-49     | 14.9 | 16.2 | 5.2  | 2.9  | 12.1 | 10.1 |
| 50-59     | 16.6 | 16.4 | 10.3 | 3.2  | 19.1 | 13.4 |
| 60-69     | 26.8 | 32.4 | 11.8 | 10.5 | 20.1 | 21.4 |
| 70-79     | 37.7 | 39.5 | 24.9 | 15.5 | 28.9 | 30.1 |

|                        |      |      |      |     |      |      |
|------------------------|------|------|------|-----|------|------|
| ≥ 80                   | 87.4 | 89.2 | 27.0 | --- | 30.9 | 57.0 |
| All ages, crude        | 27.2 | 33.0 | 10.6 | 5.0 | 19.2 | 19.2 |
| All ages, age adjusted | 13.1 | 16.4 | 6.2  | 3.1 | 14.4 | 11.1 |

Possible PHPT

| Women                  | Race      |       |       |          |       | All races |
|------------------------|-----------|-------|-------|----------|-------|-----------|
|                        | Age Group | Asian | Black | Hispanic | Other |           |
| 20-29                  | 6.8       | 5.8   | 1.4   | 1.7      | 2.8   | 3.1       |
| 30-39                  | 6.6       | 4.9   | 1.8   | 1.5      | 1.9   | 2.9       |
| 40-49                  | 6.0       | 5.3   | 2.5   | 1.5      | 1.8   | 2.7       |
| 50-59                  | 6.9       | 5.9   | 6.0   | 2.3      | 2.3   | 4.6       |
| 60-69                  | 10.8      | 8.0   | 6.3   | 4.6      | 4.9   | 5.8       |
| 70-79                  | ---       | 18.3  | 12.4  | 12.4     | 4.7   | 10.7      |
| ≥ 80                   | 108.9     | 73.4  | 48.4  | 39.5     | 21.2  | 41.8      |
| All ages, crude        | 20.0      | 13.2  | 7.7   | 7.0      | 5.8   | 8.8       |
| All ages, age adjusted | 1.8       | 2.5   | 2.1   | 1.0      | 2.4   | 2.0       |

Men

| Age Group              | Asian | Black | Hispanic | Other | White | All races |
|------------------------|-------|-------|----------|-------|-------|-----------|
| 20-29                  | 24.2  | 12.9  | 4.1      | ---   | 3.5   | 6.6       |
| 30-39                  | 15.7  | 9.8   | 2.1      | 0.8   | 3.6   | 5.3       |
| 40-49                  | 9.1   | 9.0   | 2.9      | 1.5   | 2.4   | 4.1       |
| 50-59                  | 11.0  | 9.7   | 3.9      | 2.0   | 2.6   | 5.4       |
| 60-69                  | 13.7  | 10.0  | 5.5      | ---   | 4.6   | 7.2       |
| 70-79                  | 39.4  | 23.3  | 11.6     | ---   | 5.8   | 11.5      |
| ≥ 80                   | ---   | ---   | ---      | ---   | 13.2  | 13.2      |
| All ages, crude        | 16.2  | 10.4  | 3.9      | 1.3   | 4.7   | 6.4       |
| All ages, age adjusted | 1.7   | 2.3   | 1.2      | 0.1   | 1.4   | 1.4       |

Supplemental Table 3. Prevalence of primary hyperparathyroidism per 100,000 (crude, age-adjusted) by year, 1995-2010

|       |           | 1995        | 1996        | 1997         | 1998         | 1999         | 2000         | 2001         | 2002         | 2003         |
|-------|-----------|-------------|-------------|--------------|--------------|--------------|--------------|--------------|--------------|--------------|
| Women | Classic   | 61.3, 37.3  | 103.9, 64.0 | 130.1, 79.1  | 151.5, 94.9  | 157.8, 99.5  | 148.0, 99.8  | 154.0, 110.7 | 181.2, 128.6 | 189.2, 134.8 |
|       | Non-clas. | 51.9, 29.0  | 38.4, 25.2  | 48.2, 27.3   | 43.0, 25.8   | 17.8, 10.9   | 28.6, 13.6   | 50.0, 28.7   | 81.3, 55.8   | 57.9, 38.2   |
|       | Possible  | 21.7, 10.0  | 18.9, 10.2  | 14.4, 8.9    | 14.5, 6.3    | 7.2, 3.5     | 6.1, 4.0     | 9.0, 3.8     | 7.1, 3.5     | 13.9, 4.7    |
|       | Total     | 134.9, 76.3 | 161.2, 99.4 | 192.7, 115.3 | 209.0, 127.0 | 182.8, 113.9 | 182.7, 117.4 | 213.0, 143.2 | 269.6, 187.9 | 261.0, 177.7 |
| Men   | Classic   | 31.8, 12.2  | 48.1, 24.6  | 63.0, 33.1   | 61.6, 37.7   | 72.6, 43.1   | 76.7, 48.8   | 76.1, 48.3   | 78.7, 53.4   | 76.9, 52.8   |
|       | Non-clas. | 19.6, 10.7  | 25.4, 16.8  | 23.0, 12.9   | 20.3, 14.8   | 34.2, 9.8    | 13.8, 8.2    | 9.4, 6.2     | 20.3, 15.7   | 17.1, 10.8   |
|       | Possible  | 12.4, 6.6   | 12.5, 7.9   | 14.2, 10.7   | 13.3, 7.4    | 8.7, 4.5     | 16.8, 5.4    | 8.7, 3.1     | 4.0, 1.8     | 4.9, 1.3     |
|       | Total     | 63.8, 29.5  | 86.0, 49.3  | 100.2, 56.7  | 95.2, 59.9   | 115.5, 57.4  | 107.3, 62.4  | 94.2, 57.6   | 103.0, 70.9  | 98.9, 64.9   |

  

|       |           | 2004         | 2005         | 2006         | 2007         | 2008         | 2009         | 2010         | Mean (All years) |
|-------|-----------|--------------|--------------|--------------|--------------|--------------|--------------|--------------|------------------|
| Women | Classic   | 201.4, 145.0 | 188.2, 134.8 | 180.1, 128.8 | 193.6, 136.6 | 217.8, 154.5 | 246.1, 173.4 | 284.5, 194.1 | 176.3, 119.7     |
|       | Non-clas. | 45.9, 29.3   | 45.0, 27.3   | 26.7, 14.6   | 38.0, 20.5   | 52.3, 29.6   | 46.0, 30.0   | 59.5, 34.5   | 46.2, 28.0       |
|       | Possible  | 7.5, 2.0     | 7.6, 3.2     | 4.4, 1.6     | 3.7, 1.6     | 8.4, 4.1     | 7.5, 2.8     | 9.4, 4.1     | 10.7, 5.1        |
|       | Total     | 254.8, 176.3 | 240.8, 165.3 | 211.2, 145.0 | 235.3, 158.7 | 278.5, 188.2 | 299.6, 206.2 | 353.4, 232.7 | 233.2, 152.8     |
| Men   | Classic   | 81.1, 57.1   | 78.4, 52.8   | 75.2, 53.1   | 82.4, 57.8   | 93.9, 61.6   | 97.9, 67.4   | 111.1, 72.0  | 77.2, 48.5       |
|       | Non-clas. | 12.9, 8.2    | 20.7, 9.8    | 8.1, 2.6     | 13.3, 8.1    | 21.4, 13.9   | 24.6, 11.4   | 24.9, 12.2   | 19.5, 11.2       |
|       | Possible  | 4.5, 2.0     | 2.6, 1.1     | 3.0, 1.0     | 5.5, 1.0     | 3.8, 0.7     | 3.6, 1.3     | 3.2, 1.0     | 9.5, 4.8         |
|       | Total     | 98.5, 67.3   | 101.7, 63.7  | 86.3, 56.7   | 101.2, 66.9  | 119.1, 76.2  | 126.1, 80.1  | 139.2, 85.2  | 106.2, 64.5      |

Supplemental Table 4. Average primary hyperparathyroidism crude and age-adjusted prevalence rates by race and age group for women and men (all years)

ALL PHPT GROUPS

| Women                  |       | Race  |          |       |       |                  | All races (mean) |
|------------------------|-------|-------|----------|-------|-------|------------------|------------------|
| Age Group              | Asian | Black | Hispanic | Other | White |                  |                  |
| 20-29                  | 26.4  | 31.1  | 9.7      | 4.9   | 18.7  | 17.0             |                  |
| 30-39                  | 27.7  | 69.7  | 17.1     | 6.7   | 41.4  | 33.1             |                  |
| 40-49                  | 41.4  | 122.4 | 43.0     | 12.4  | 77.9  | 59.1             |                  |
| 50-59                  | 178.4 | 336.9 | 151.6    | 63.5  | 256.7 | 197.8            |                  |
| 60-69                  | 240.1 | 652.4 | 269.2    | 111.3 | 450.3 | 344.7            |                  |
| 70-79                  | 336.2 | 921.5 | 398.3    | 182.1 | 630.3 | 492.2            |                  |
| ≥ 80                   | 333.1 | 806.6 | 359.7    | 205.0 | 534.7 | 452.8            |                  |
| All ages, crude        | 169.0 | 420.1 | 178.4    | 83.7  | 287.1 | 233.2            |                  |
| All ages, age adjusted | 103.1 | 321.7 | 118.3    | 50.1  | 201.0 | 152.8            |                  |
| Men                    |       |       |          |       |       |                  |                  |
| Age Group              | Asian | Black | Hispanic | Other | White | All races (mean) |                  |
| 20-29                  | 47.7  | 56.7  | 16.9     | 3.4   | 30.3  | 28.5             |                  |
| 30-39                  | 62.5  | 100.4 | 19.7     | 5.2   | 37.3  | 44.1             |                  |
| 40-49                  | 62.1  | 110.3 | 36.3     | 8.2   | 53.2  | 54.5             |                  |
| 50-59                  | 117.7 | 148.8 | 46.1     | 9.6   | 96.1  | 84.4             |                  |
| 60-69                  | 109.0 | 305.4 | 95.7     | 29.9  | 111.5 | 132.1            |                  |
| 70-79                  | 176.6 | 357.1 | 131.5    | 52.5  | 201.9 | 183.6            |                  |
| ≥ 80                   | 319.8 | 481.1 | 117.6    | 50.2  | 164.6 | 264.1            |                  |
| All ages, crude        | 127.9 | 222.8 | 66.2     | 22.7  | 99.3  | 106.2            |                  |
| All ages, age adjusted | 63.1  | 138.4 | 39.9     | 10.3  | 69.1  | 64.5             |                  |

Classic PHPT

| Women     |       | Race  |          |       |       |      | All races (mean) |
|-----------|-------|-------|----------|-------|-------|------|------------------|
| Age Group | Asian | Black | Hispanic | Other | White |      |                  |
| 20-29     | 10.2  | 15.5  | 5.0      | 1.7   | 10.1  | 8.7  |                  |
| 30-39     | 14.8  | 53.4  | 11.9     | 3.2   | 32.4  | 23.4 |                  |
| 40-49     | 24.6  | 102.5 | 34.4     | 7.5   | 62.8  | 46.4 |                  |

|                        |       |       |       |       |       |       |
|------------------------|-------|-------|-------|-------|-------|-------|
| 50-59                  | 129.4 | 284.8 | 118.5 | 38.3  | 191.0 | 152.4 |
| 60-69                  | 160.0 | 571.5 | 219.9 | 75.6  | 345.4 | 274.5 |
| 70-79                  | 205.2 | 798.1 | 320.6 | 133.0 | 489.8 | 389.3 |
| ≥ 80                   | 137.4 | 628.8 | 227.1 | 132.8 | 412.4 | 321.6 |
| All ages, crude        | 101.3 | 356.8 | 133.9 | 57.8  | 220.6 | 176.3 |
| All ages, age adjusted | 69.3  | 245.9 | 93.5  | 35.3  | 154.7 | 119.7 |

|                        |      |       |      |      |       |       |
|------------------------|------|-------|------|------|-------|-------|
| Men                    |      |       |      |      |       |       |
| Age Group              |      |       |      |      |       |       |
| 20-29                  | 17.3 | 18.7  | 8.8  | 1.6  | 18.5  | 13.4  |
| 30-39                  | 29.3 | 75.2  | 12.3 | 1.9  | 22.3  | 29.0  |
| 40-49                  | 36.9 | 81.3  | 27.4 | 4.3  | 37.8  | 38.1  |
| 50-59                  | 71.7 | 118.8 | 30.8 | 5.1  | 72.6  | 61.1  |
| 60-69                  | 62.1 | 256.2 | 76.0 | 15.4 | 85.5  | 99.5  |
| 70-79                  | 99.5 | 294.3 | 93.0 | 37.0 | 165.5 | 142.1 |
| ≥ 80                   | 99.1 | 387.6 | 90.6 | 50.2 | 117.5 | 168.9 |
| All ages, crude        | 57.2 | 175.0 | 49.3 | 14.6 | 74.2  | 77.2  |
| All ages, age adjusted | 40.0 | 113.4 | 30.8 | 6.8  | 51.4  | 48.5  |

Non-classic PHPT

|                        |       |       |          |       |       |                  |
|------------------------|-------|-------|----------|-------|-------|------------------|
| Women                  |       |       |          |       |       |                  |
|                        | Race  |       |          |       |       |                  |
| Age Group              | Asian | Black | Hispanic | Other | White | All races (mean) |
| 20-29                  | 9.4   | 7.9   | 2.9      | 1.6   | 5.1   | 4.4              |
| 30-39                  | 6.4   | 9.7   | 3.1      | 1.9   | 6.5   | 5.6              |
| 40-49                  | 9.2   | 13.5  | 5.4      | 3.4   | 12.5  | 8.6              |
| 50-59                  | 39.3  | 44.8  | 23.7     | 22.6  | 61.0  | 38.3             |
| 60-69                  | 66.4  | 65.8  | 37.5     | 30.6  | 97.5  | 59.5             |
| 70-79                  | 102.0 | 96.5  | 64.8     | 34.2  | 133.0 | 86.4             |
| ≥ 80                   | 134.6 | 127.4 | 84.2     | 45.0  | 104.8 | 97.7             |
| All ages, crude        | 58.7  | 60.1  | 31.5     | 21.8  | 60.5  | 46.2             |
| All ages, age adjusted | 28.7  | 34.1  | 19.9     | 13.4  | 42.3  | 28.0             |

|           |      |      |     |     |      |     |
|-----------|------|------|-----|-----|------|-----|
| Men       |      |      |     |     |      |     |
| Age Group |      |      |     |     |      |     |
| 20-29     | 21.1 | 16.6 | 3.4 | 1.8 | 8.5  | 8.1 |
| 30-39     | 18.3 | 13.7 | 4.1 | 2.3 | 10.7 | 8.9 |



|                        |      |      |      |      |      |      |
|------------------------|------|------|------|------|------|------|
| 40-49                  | 14.9 | 16.2 | 5.2  | 2.9  | 12.1 | 10.1 |
| 50-59                  | 16.6 | 16.4 | 10.3 | 3.2  | 19.1 | 13.4 |
| 60-69                  | 26.9 | 32.4 | 11.8 | 10.5 | 20.1 | 21.4 |
| 70-79                  | 37.7 | 39.5 | 24.9 | 15.5 | 28.9 | 30.1 |
| ≥ 80                   | 87.4 | 93.5 | 27.0 | 0    | 30.9 | 59.4 |
| All ages, crude        | 27.2 | 34.4 | 10.6 | 5.0  | 19.2 | 19.5 |
| All ages, age adjusted | 13.1 | 16.7 | 6.2  | 3.1  | 14.4 | 11.2 |

Possible PHPT

| Women                  |       | Race  |          |       |       |      | All races (mean) |
|------------------------|-------|-------|----------|-------|-------|------|------------------|
| Age Group              | Asian | Black | Hispanic | Other | White |      |                  |
| 20-29                  | 6.8   | 7.7   | 1.8      | 1.5   | 3.6   | 3.9  |                  |
| 30-39                  | 6.5   | 6.6   | 2.1      | 1.6   | 2.5   | 4.1  |                  |
| 40-49                  | 7.6   | 6.4   | 3.1      | 1.5   | 2.6   | 4.1  |                  |
| 50-59                  | 9.7   | 7.3   | 9.4      | 2.5   | 4.7   | 7.1  |                  |
| 60-69                  | 13.7  | 15.1  | 11.8     | 5.1   | 7.4   | 10.7 |                  |
| 70-79                  | 29.0  | 26.9  | 12.9     | 14.9  | 7.5   | 16.5 |                  |
| ≥ 80                   | 61.1  | 50.4  | 48.4     | 27.2  | 17.5  | 33.5 |                  |
| All ages, crude        | 14.2  | 15.7  | 10.9     | 4.8   | 7.0   | 10.7 |                  |
| All ages, age adjusted | 5.1   | 8.2   | 4.9      | 1.4   | 4.0   | 5.1  |                  |

Men

| Age Group              | Asian | Black | Hispanic | Other | White | All races (mean) |
|------------------------|-------|-------|----------|-------|-------|------------------|
| 20-29                  | 9.3   | 21.4  | 4.7      | 0     | 3.3   | 7.0              |
| 30-39                  | 14.9  | 11.5  | 3.3      | 1.0   | 4.3   | 6.2              |
| 40-49                  | 10.3  | 12.8  | 3.7      | 1.0   | 3.3   | 6.3              |
| 50-59                  | 29.4  | 13.6  | 5.0      | 1.3   | 4.4   | 9.9              |
| 60-69                  | 20.0  | 16.8  | 7.9      | 4.0   | 5.9   | 11.2             |
| 70-79                  | 39.4  | 23.3  | 13.6     | 0     | 7.5   | 11.4             |
| ≥ 80                   | 133.3 | 0     | 0        | 0     | 16.2  | 35.8             |
| All ages, crude        | 24.6  | 14.4  | 5.3      | 1.4   | 5.9   | 9.5              |
| All ages, age adjusted | 10.0  | 8.3   | 2.9      | 0.4   | 3.3   | 4.8              |

Supplemental Table 5. Crude and age-adjusted prevalence rates by race and age group for women and men (2010 only).

ALL PHPT GROUPS

| Women                  |       | Race    |          |       |        |       | All races (mean) |
|------------------------|-------|---------|----------|-------|--------|-------|------------------|
| Age Group              | Asian | Black   | Hispanic | Other | White  |       |                  |
| 20-29                  | 6.9   | 30.6    | 11.4     | 2.4   | 20.1   | 14.3  |                  |
| 30-39                  | 16.7  | 70.6    | 18.3     | 6.8   | 43.8   | 31.3  |                  |
| 40-49                  | 82.8  | 166.8   | 50.6     | 9.8   | 119.7  | 85.9  |                  |
| 50-59                  | 237.2 | 510.4   | 182.7    | 45.2  | 353.4  | 265.8 |                  |
| 60-69                  | 393.0 | 1,043.0 | 338.9    | 93.3  | 660.6  | 505.8 |                  |
| 70-79                  | 533.2 | 1,408.9 | 598.7    | 181.0 | 1109.9 | 766.3 |                  |
| ≥ 80                   | 631.1 | 1,374.6 | 619.2    | 162.8 | 894.5  | 736.5 |                  |
| All ages, crude        | 271.6 | 657.8   | 260.0    | 71.6  | 457.4  | 353.4 |                  |
| All ages, age adjusted | 183.7 | 447.9   | 169.4    | 46.2  | 312.0  | 232.7 |                  |
| Men                    |       |         |          |       |        |       |                  |
| Age Group              |       |         |          |       |        |       |                  |
| 20-29                  | 22.2  | 41.0    | 12.8     | 1.9   | 31.1   | 21.8  |                  |
| 30-39                  | 46.2  | 101.0   | 21.1     | 1.0   | 33.2   | 40.5  |                  |
| 40-49                  | 41.8  | 104.5   | 38.4     | 4.0   | 74.1   | 52.6  |                  |
| 50-59                  | 98.1  | 182.3   | 47.9     | 17.5  | 122.2  | 93.6  |                  |
| 60-69                  | 151.0 | 478.6   | 117.8    | 18.0  | 163.9  | 185.8 |                  |
| 70-79                  | 167.0 | 511.2   | 186.4    | 36.1  | 393.2  | 258.8 |                  |
| ≥ 80                   | 182.6 | 369.4   | 211.9    | 108.6 | 312.1  | 236.9 |                  |
| All ages, crude        | 101.3 | 255.4   | 90.9     | 26.7  | 161.4  | 139.2 |                  |
| All ages, age adjusted | 71.8  | 177.5   | 54.8     | 12.0  | 103.1  | 85.2  |                  |

Classic PHPT

| Women                  |       | Race   |          |       |       |       | All races (mean) |
|------------------------|-------|--------|----------|-------|-------|-------|------------------|
| Age Group              | Asian | Black  | Hispanic | Other | White |       |                  |
| 20-29                  | 6.9   | 30.6   | 7.1      | 2.4   | 10.0  | 11.4  |                  |
| 30-39                  | 8.3   | 65.2   | 16.2     | 5.1   | 33.9  | 25.7  |                  |
| 40-49                  | 50.6  | 158.8  | 43.8     | 4.9   | 105.9 | 72.5  |                  |
| 50-59                  | 192.4 | 452.3  | 157.1    | 40.3  | 294.1 | 227.2 |                  |
| 60-69                  | 310.6 | 944.5  | 307.3    | 74.6  | 551.2 | 437.6 |                  |
| 70-79                  | 350.8 | 1281.7 | 519.7    | 156.3 | 933.7 | 648.4 |                  |
| ≥ 80                   | 385.7 | 1169.5 | 450.3    | 116.3 | 718.9 | 568.1 |                  |
| All ages, crude        | 186.5 | 586.1  | 214.5    | 57.1  | 378.2 | 284.5 |                  |
| All ages, age adjusted | 129.2 | 402.6  | 142.6    | 37.3  | 258.8 | 194.0 |                  |
| Men                    |       |        |          |       |       |       |                  |
| Age Group              |       |        |          |       |       |       |                  |
| 20-29                  | 22.2  | 41.0   | 10.6     | 1.9   | 25.9  | 20.3  |                  |
| 30-39                  | 27.6  | 89.7   | 19.5     | ---   | 24.9  | 40.5  |                  |
| 40-49                  | 41.8  | 104.5  | 34.2     | 3.0   | 60.4  | 48.8  |                  |
| 50-59                  | 91.1  | 162.8  | 42.5     | 13.8  | 100.6 | 82.8  |                  |
| 60-69                  | 125.8 | 435.1  | 98.2     | 10.3  | 121.7 | 158.2 |                  |
| 70-79                  | 121.4 | 458.8  | 159.8    | 18.0  | 314.0 | 214.4 |                  |
| ≥ 80                   | 91.3  | 332.5  | 211.9    | 108.6 | 250.6 | 199.0 |                  |
| All ages, crude        | 74.5  | 232.1  | 82.4     | 25.9  | 128.3 | 108.6 |                  |
| All ages, age adjusted | 58.0  | 162.7  | 48.4     | 8.9   | 82.0  | 72.0  |                  |

Non-classic PHPT

| Women                  |       | Race  |          |       |       |       | All races (mean) |
|------------------------|-------|-------|----------|-------|-------|-------|------------------|
| Age Group              | Asian | Black | Hispanic | Other | White |       |                  |
| 20-29                  | ---   | ---   | 2.4      | ---   | 10.0  | 6.4   |                  |
| 30-39                  | 8.4   | 5.4   | 2.2      | 1.7   | 10.0  | 5.5   |                  |
| 40-49                  | 23.0  | 4     | 3.4      | 3.3   | 12.3  | 9.2   |                  |
| 50-59                  | 35.8  | 53.9  | 21.1     | 4.8   | 54.5  | 34.0  |                  |
| 60-69                  | 76.0  | 81.1  | 34.6     | 18.6  | 102.3 | 61.9  |                  |
| 70-79                  | 182.4 | 107.6 | 79.1     | 24.7  | 173.9 | 113.5 |                  |
| ≥ 80                   | 245.4 | 164.1 | 140.7    | 46.5  | 172.4 | 153.8 |                  |
| All ages, crude        | 95.2  | 69.4  | 40.1     | 16.6  | 76.5  | 59.6  |                  |
| All ages, age adjusted | 50.6  | 37.9  | 23.5     | 8.6   | 51.1  | 34.5  |                  |
| Men                    |       |       |          |       |       |       |                  |
| Age Group              |       |       |          |       |       |       |                  |
| 20-29                  | ---   | ---   | 2.1      | ---   | 5.2   | 3.6   |                  |
| 30-39                  | 18.5  | 11.2  | ---      | ---   | 8.3   | 12.7  |                  |
| 40-49                  | ---   | ---   | 4.1      | 1.0   | 13.6  | 6.2   |                  |
| 50-59                  | 7.0   | 19.5  | 3.5      | 2.5   | 20.1  | 10.5  |                  |
| 60-69                  | 25.2  | 43.5  | 16.4     | 7.7   | 37.3  | 26.0  |                  |
| 70-79                  | 45.5  | 52.4  | 26.6     | 18.0  | 68.9  | 42.3  |                  |
| ≥ 80                   | 91.3  | 36.9  | ---      | ---   | 61.5  | 63.2  |                  |
| All ages, crude        | 37.5  | 32.7  | 10.6     | 7.3   | 30.7  | 23.8  |                  |
| All ages, age adjusted | 13.9  | 14.8  | 5.4      | 2.7   | 19.7  | 12.2  |                  |

## Possible PHPT

| Women                  |       | Race  |          |       |       |      | All races (mean) |
|------------------------|-------|-------|----------|-------|-------|------|------------------|
| Age Group              | Asian | Black | Hispanic | Other | White |      |                  |
| 20-29                  | ---   | ---   | 1.4      | ---   | ---   | 1.4  |                  |
| 30-39                  | ---   | ---   | ---      | ---   | ---   | ---  |                  |
| 40-49                  | 9.2   | 4.0   | 3.4      | 1.6   | 1.5   | 3.9  |                  |
| 50-59                  | 8.9   | 4.1   | 4.5      | ---   | 4.8   | 5.6  |                  |
| 60-69                  | 6.3   | 17.4  | ---      | ---   | 7.1   | 10.3 |                  |
| 70-79                  | ---   | 19.6  | ---      | ---   | 2.3   | 10.9 |                  |
| ≥ 80                   | ---   | 41.0  | 28.1     | ---   | 3.2   | 24.1 |                  |
| All ages, crude        | 8.2   | 17.2  | 9.4      | 1.6   | 3.8   | 8.0  |                  |
| All ages, age adjusted | 3.9   | 7.4   | 3.3      | 0.3   | 2.2   | 4.1  |                  |
| Men                    |       |       |          |       |       |      |                  |
| Age Group              |       |       |          |       |       |      |                  |
| 20-29                  | ---   | ---   | ---      | ---   | ---   | ---  |                  |
| 30-39                  | ---   | ---   | 1.6      | 1.0   | ---   | 1.3  |                  |
| 40-49                  | ---   | ---   | ---      | ---   | ---   | ---  |                  |
| 50-59                  | ---   | ---   | 1.8      | 1.2   | 1.4   | 1.5  |                  |
| 60-69                  | ---   | ---   | 3.3      | ---   | 4.9   | 4.1  |                  |
| 70-79                  | ---   | ---   | ---      | ---   | 10.2  | 10.2 |                  |
| ≥ 80                   | ---   | ---   | ---      | ---   | ---   | ---  |                  |
| All ages, crude        | ---   | ---   | 2.2      | 1.1   | 5.5   | 1.8  |                  |
| All ages, age adjusted | ---   | ---   | 1.0      | 0.4   | 1.4   | 1.0  |                  |

Supplemental Table 6. Vitamin D levels by race and by gender

| Gender | Vitamin D level | Race         |                |                |                   |                |                | *p-value |
|--------|-----------------|--------------|----------------|----------------|-------------------|----------------|----------------|----------|
|        |                 | All<br>n (%) | Asian<br>n (%) | Black<br>n (%) | Hispanic<br>n (%) | Other<br>n (%) | White<br>n (%) |          |
| All    | Sufficient      | 2,267 (43.8) | 175 (61.8)     | 250 (40.2)     | 277 (44.5)        | 108 (50.0)     | 1,457 (60.7)   | 0.004    |
|        | Insufficient    | 1,198 (28.9) | 76 (26.8)      | 180 (28.9)     | 204 (32.7)        | 66 (30.6)      | 672 (28.0)     |          |
|        | Deficient       | 680 (16.4)   | 32 (11.3)      | 192 (30.9)     | 142 (22.8)        | 42 (16.0)      | 272 (11.3)     |          |
| Women  | Sufficient      | 1,814 (56.0) | 144 (63.7)     | 201 (41.4)     | 215 (44.3)        | 90 (53.6)      | 1,164 (37.6)   | 0.018    |
|        | Insufficient    | 908 (28.0)   | 61 (27.0)      | 138 (28.4)     | 154 (31.8)        | 51 (30.4)      | 504 (26.9)     |          |
|        | Deficient       | 518 (16.0)   | 21 (9.3)       | 146 (30.2)     | 116 (23.9)        | 27 (16.0)      | 208 (11.1)     |          |
| Men    | Sufficient      | 453 (50.0)   | 31 (54.4)      | 49 (35.8)      | 62 (44.9)         | 18 (37.6)      | 293 (55.8)     | 0.317    |
|        | Insufficient    | 290 (32.0)   | 15 (26.3)      | 42 (30.6)      | 50 (36.3)         | 15 (31.2)      | 168 (32.0)     |          |
|        | Deficient       | 162 (17.9)   | 11 (19.3)      | 46 (33.6)      | 26 (18.8)         | 15 (31.2)      | 64 (12.2)      |          |

Sufficient:  $\geq 30$  ng/mL ( $\geq 74.9$  nmol/L)

Insufficient: 20-29 ng/mL (49.9-72.4 nmol/L)

Deficient:  $< 20$  ng/mL ( $< 49.9$  nmol/L)

Note: Percents of Vitamin D levels total within race group for each gender.

\*Results from chi-square tests using a 5x3 frequency table
